# Supplementary material for: Sustained Release of Hydrophilic l-ascorbic acid 2-phosphate Magnesium from Electrospun Polycaprolactone Scaffold—A Study across Blend, Coaxial, and Emulsion Electrospinning Techniques
Source: MDPI journal article supplement (doi:10.3390/ma7117398), 2014-11-17

## Supplementary Materials

**Figure S1.** Comparison of fiber diameters of the scaffolds produced through different electrospinning techniques ( $n = 50$ ).

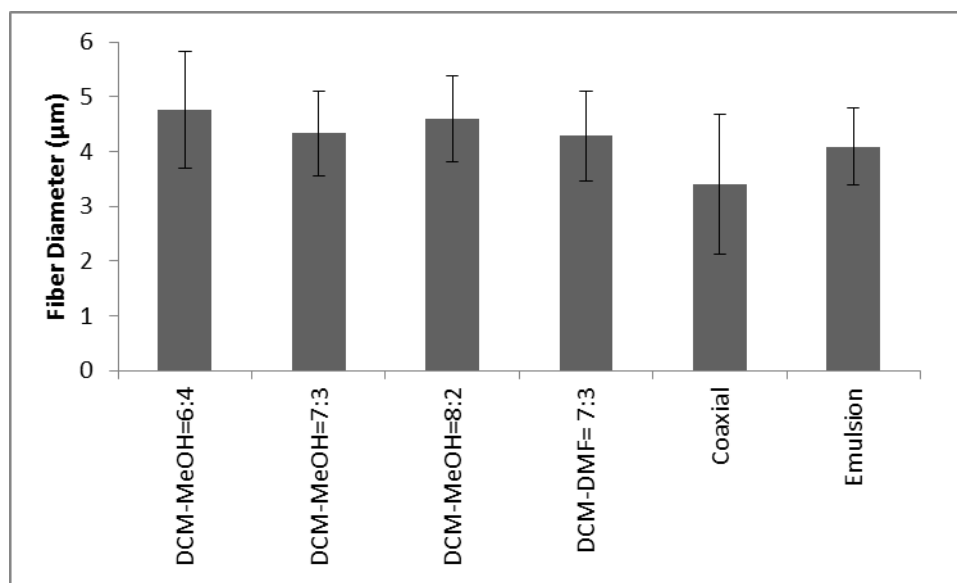

Supplement: s1 [file s1]
